# Supplementary material
Source: MDPI journal article supplement (https://www.mdpi.com/2073-4352/7/7/227)
Supplement: s1 [file s1]

Archive with 5 entries (5 files):
- Figures S1-S6.pdf
- Video S1 [corresp. to Figure 3] (submitted).mp4
- Video S2 [corresp. to Figure 8(a)] (submitted).mp4
- Video S3 [corresp. to Figure 8(b)] (submitted).mp4
- Video S4 [corresp. to Figure 8(b)] (submitted).mp4
