# Supplementary material
Source: MDPI journal article supplement (https://www.mdpi.com/2073-4352/7/7/227)
Supplement: s1 [file s1 › Figures S1-S6.pdf]

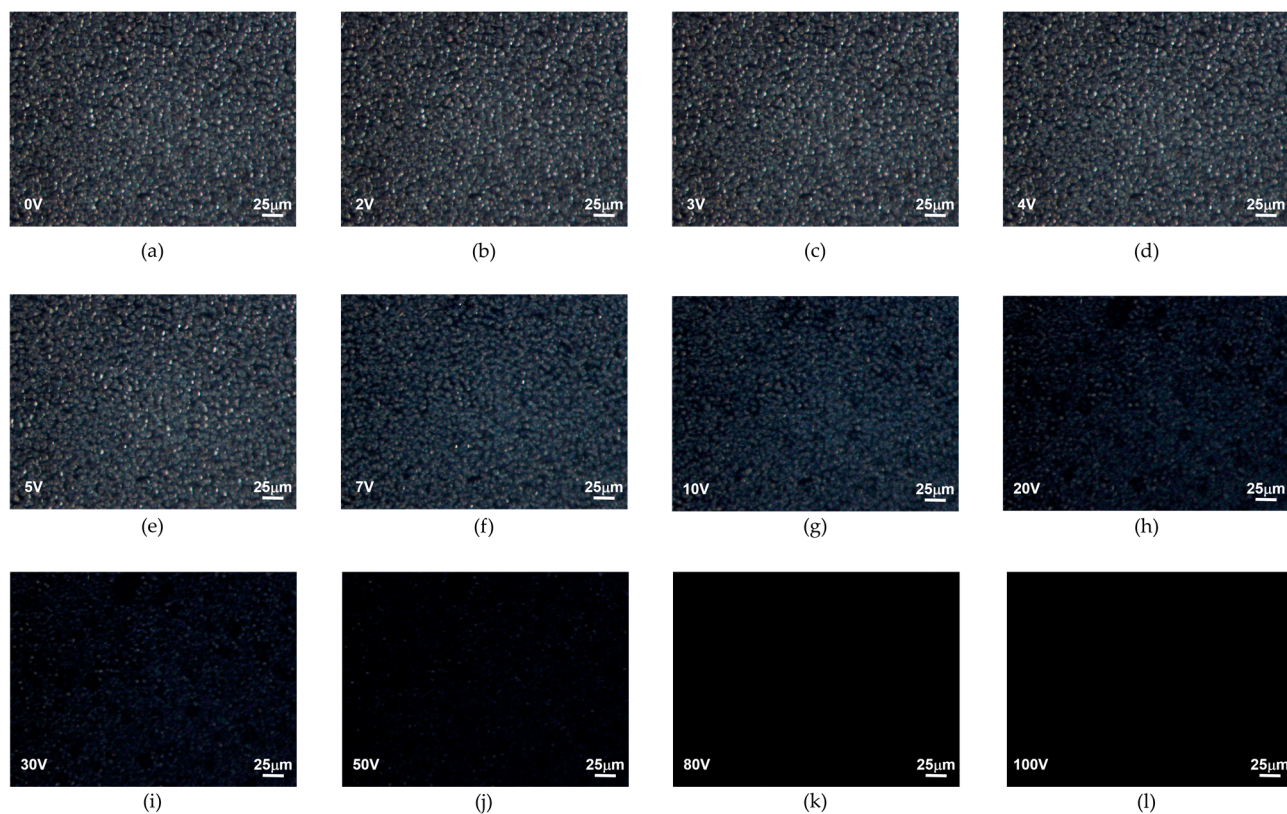

**Figure S1.** (a)–(l) Recorded POM images of PDLC obtained after UV curing with intensity of 6.61, mW/cm<sup>2</sup> for 12 h at V = 0–100 V.

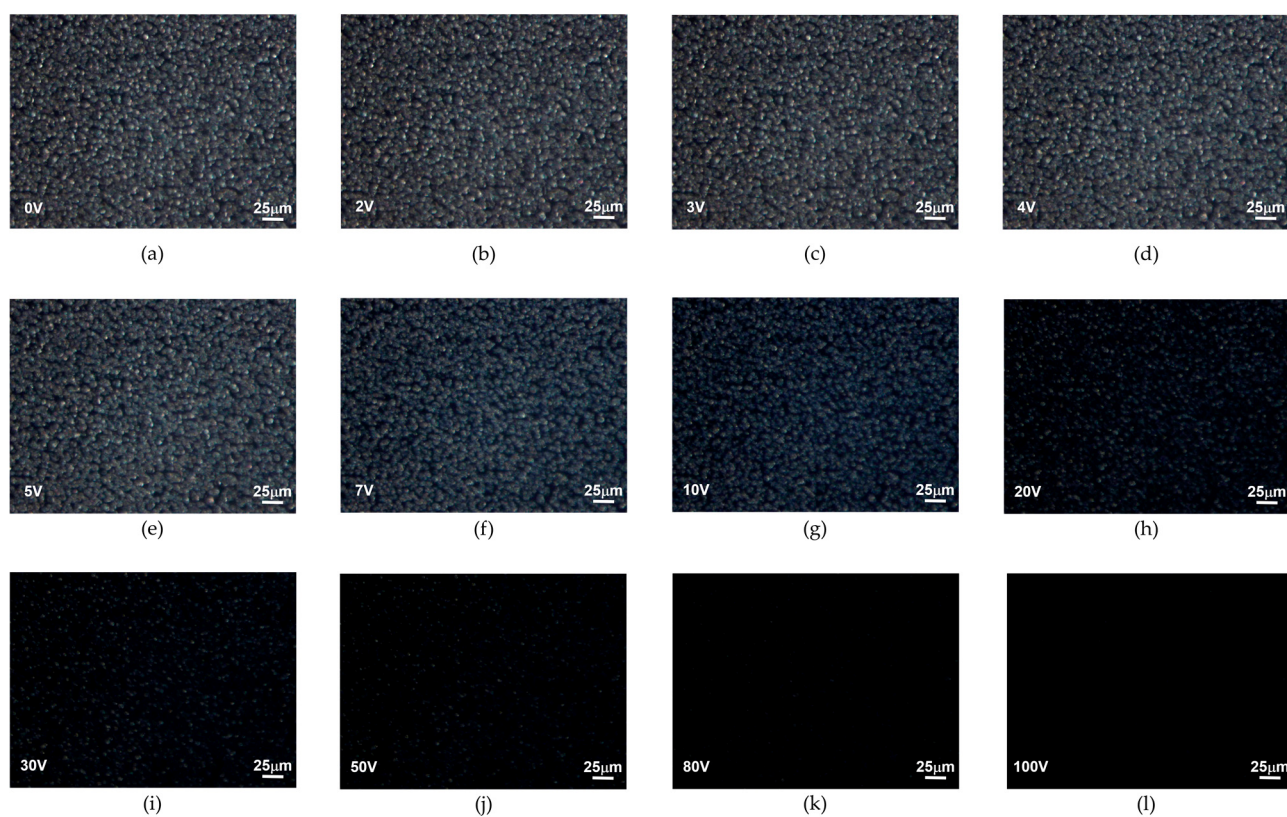

**Figure S2.** (a)–(l) Recorded POM images of PDLC obtained after UV curing with intensity of 5.74 mW/cm<sup>2</sup> for 12 h at V = 0–100 V.

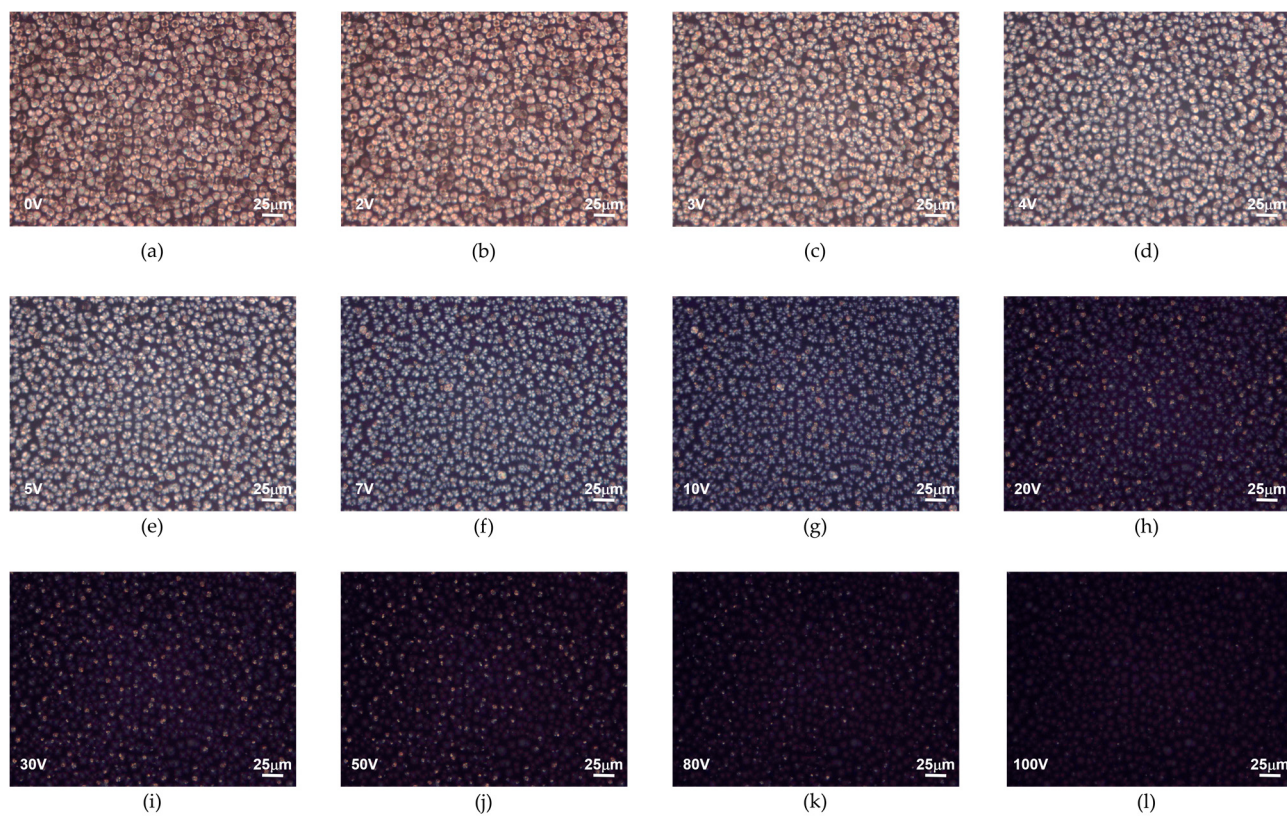

**Figure S3.** (a)–(l) Recorded POM images of PDLC obtained after UV curing with intensity of  $4.33 \text{ mW/cm}^2$  for 12 h at  $V = 0$ – $100 \text{ V}$ .

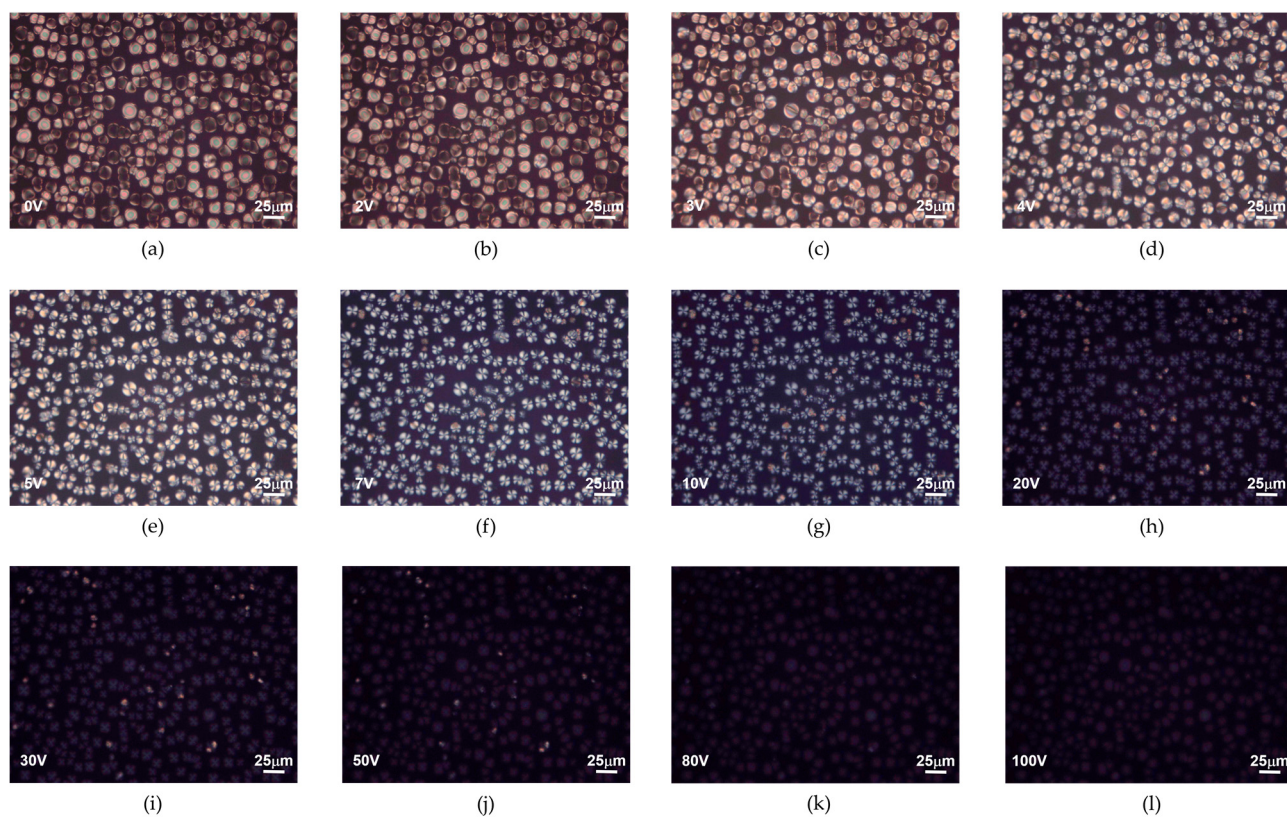

**Figure S4.** (a)–(l) Recorded POM images of PDLC obtained after UV curing with intensity of  $1.53 \text{ mW/cm}^2$  for 12 h at  $V = 0$ – $100 \text{ V}$ .

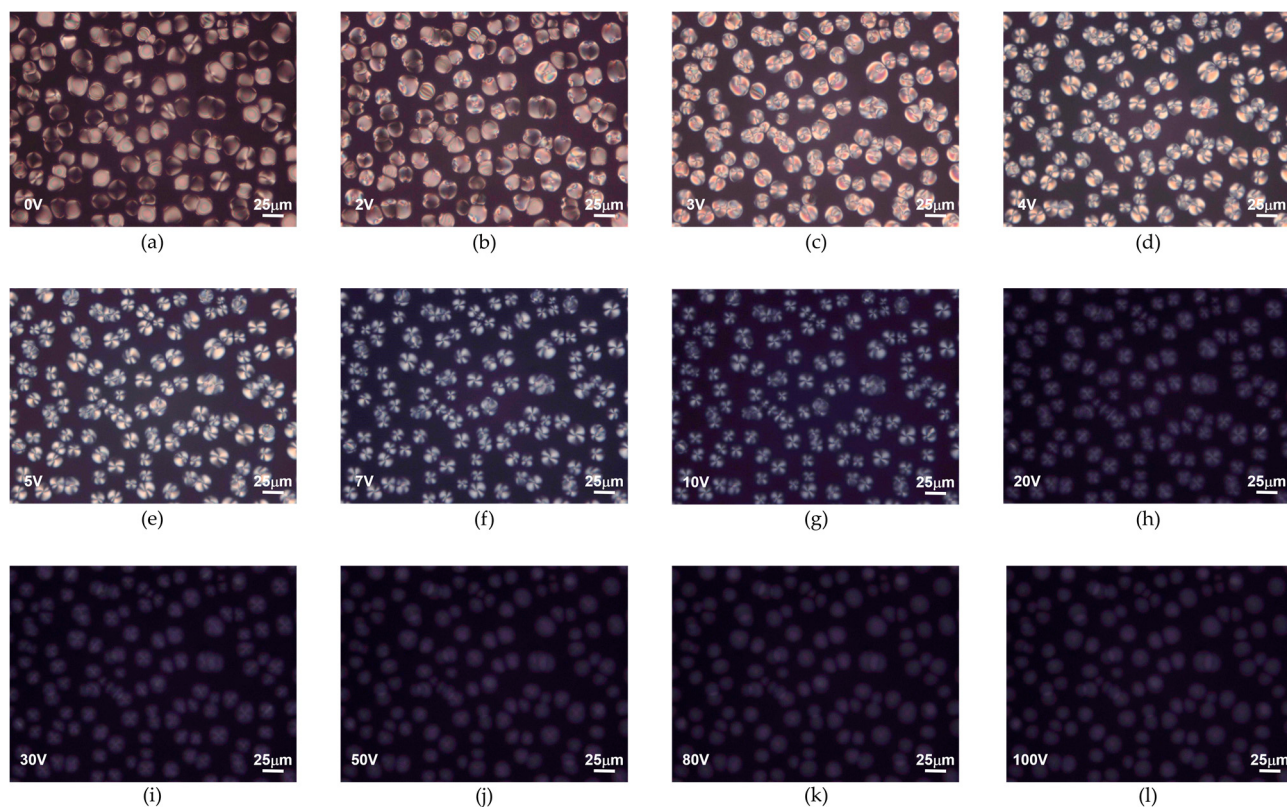

**Figure S5.** (a)–(l) Recorded POM images of PDLC obtained after UV curing with intensity of  $0.92 \text{ mW/cm}^2$  for 12 h at  $V = 0$ – $100 \text{ V}$ .

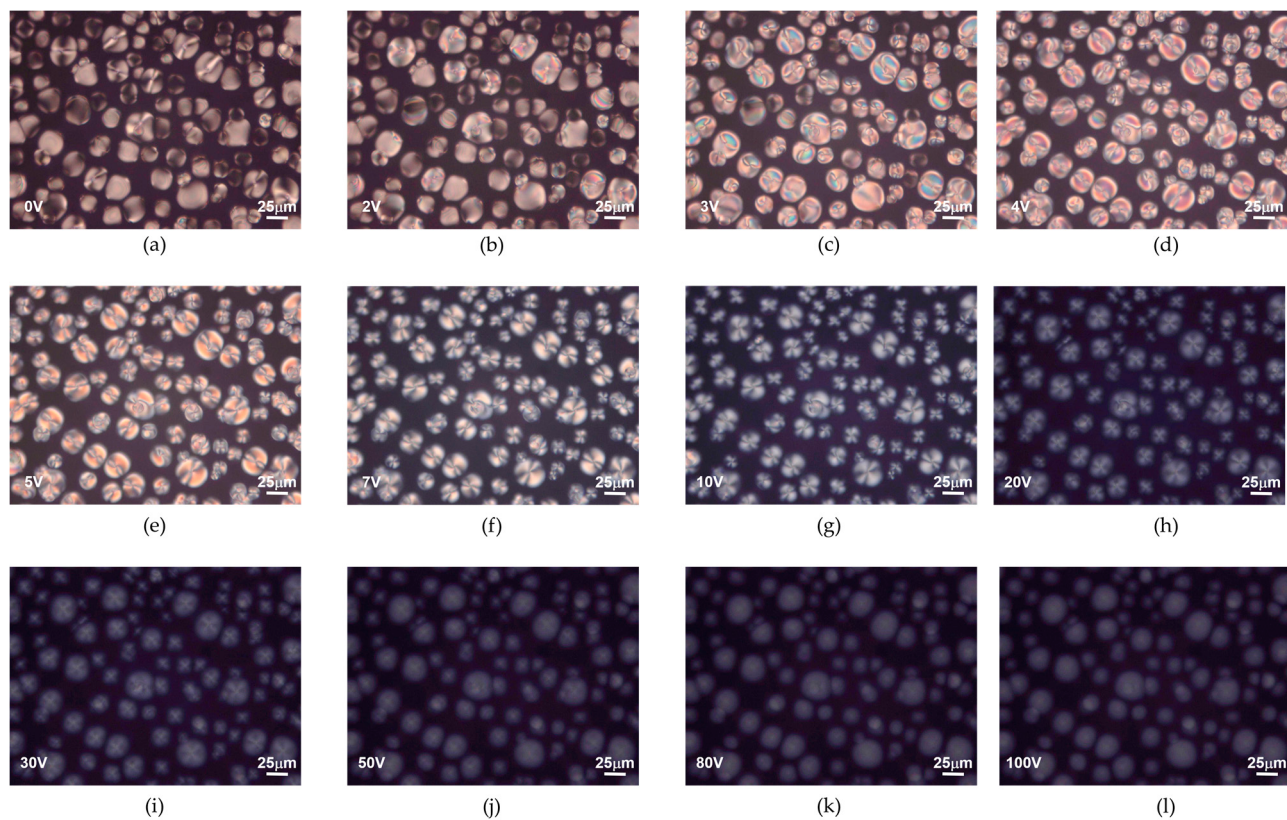

**Figure S6.** (a)–(l) Recorded POM images of PDLC obtained after UV curing with intensity of  $0.83 \text{ mW/cm}^2$  for 12 h at  $V = 0$ – $100 \text{ V}$ .
